# Supplementary material for: Coronary blood flow influences tolerance to environmental extremes in fish
Source: Oxford University Press journal article supplement (doi:10.1242/jeb.239970), 2021-03-09
Supplement: jeb239970supp.pdf [file jeb239970supp.pdf]

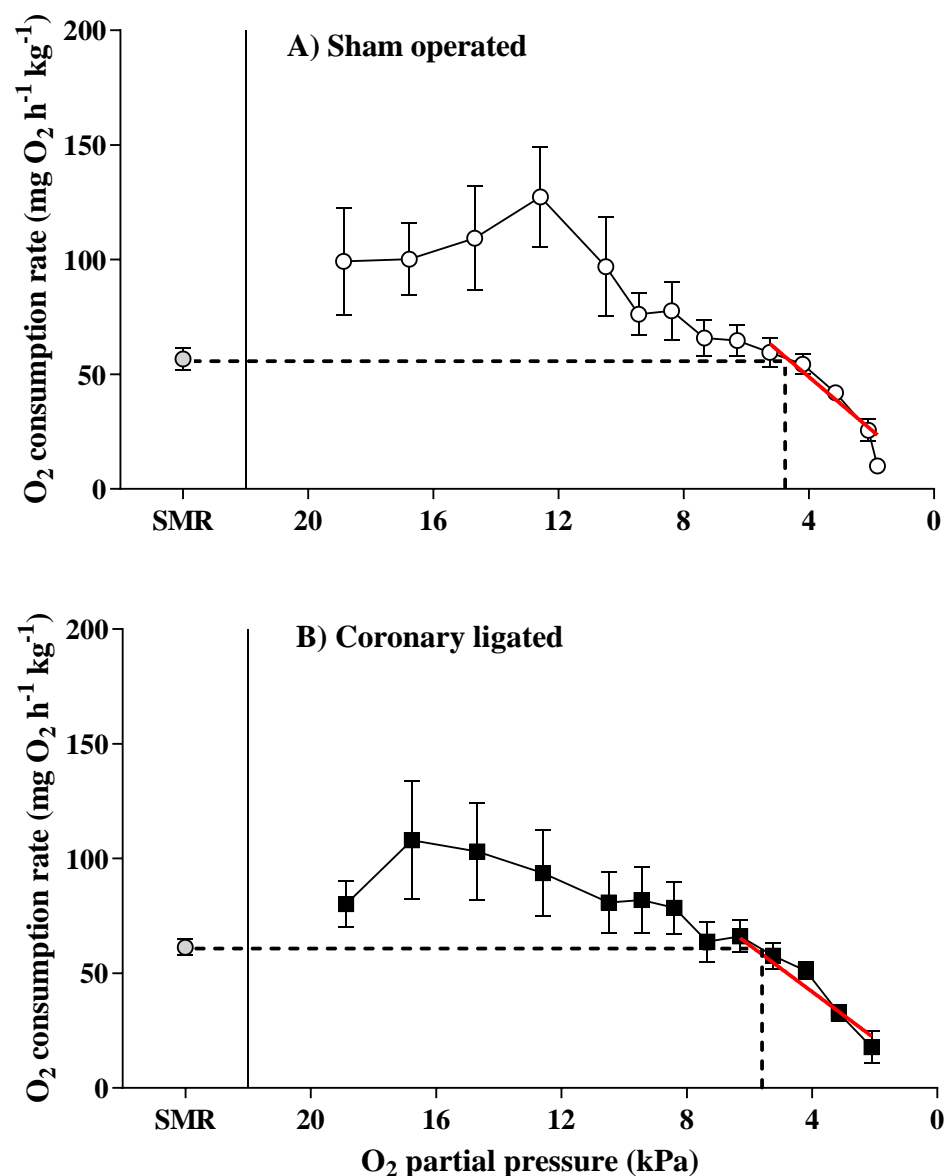

**Figure S1. Method of determining the critical O<sub>2</sub> tension for oxygen consumption rate ( $P_{crit}$ ) in rainbow trout.** O<sub>2</sub> consumption of sham operated and coronary ligated rainbow trout during hypoxia. Whole-animal oxygen consumption ( $MO_2$ ) in A) sham operated trout (open circles,  $n = 8$ ) and B) coronary ligated trout (filled squares;  $n = 9$ ). The grey data point on each graph represents standard metabolic rate (SMR). This plot includes only the  $MO_2$  traces down to  $P_{LOE}$  of those individuals where  $P_{crit}$  could be estimated. Red lines represents the regression line including  $MO_2$  values below and one data point above the interception point of SMR with the  $MO_2$  traces. Values are means  $\pm$  SEM.

**Table S1. Summary of the coefficients of the multiple regression model for cardiovascular variables and environmental tolerances in sham operated and coronary ligated rainbow trout (*Oncorhynchus mykiss*).**

|                   |                               | <i>B</i> | <i>Std. Error B</i> | $\beta$ | <i>p</i> | 95.0 % Confidence interval for <i>B</i> |             |
|-------------------|-------------------------------|----------|---------------------|---------|----------|-----------------------------------------|-------------|
|                   |                               |          |                     |         |          | Lower bound                             | Upper bound |
| P <sub>LOE</sub>  | Intercept                     | 6.883    | 1.226               |         | 0.000    | 4.316                                   | 9.450       |
|                   | Relative ventricular mass     | -18.713  | 10.647              | -0.303  | 0.095    | -40.997                                 | 3.571       |
|                   | Percentage compact myocardium | -4.410   | 2.125               | -0.378  | 0.052    | -8.857                                  | 0.038       |
|                   | Peak SV <sub>hypoxia</sub>    | -2.230   | 0.666               | -0.610  | 0.003    | -3.625                                  | -0.835      |
| CT <sub>max</sub> | Intercept                     | 24.647   | 0.474               |         | 0.000    | 23.661                                  | 25.634      |
|                   | Peak CO <sub>warming</sub>    | 0.060    | 0.019               | 0.562   | 0.005    | 0.020                                   | 0.101       |
| CT <sub>max</sub> | Intercept                     | 29.332   | 0.914               |         | 0.000    | 27.427                                  | 31.238      |
|                   | P <sub>LOE</sub>              | -0.596   | 0.332               | -0.331  | 0.087    | -1.288                                  | 0.095       |
|                   | Treatment                     | -1.013   | 0.404               | -0.461  | 0.021    | -1.856                                  | -0.170      |

The output of the multiple linear regression model displaying the relative contribution of different variables in explaining the variability in temperature and hypoxia tolerance. The abbreviations are: unstandardized regression coefficient (*B*), standard error of *B* (*Std. Error B*) and standardized coefficient ( $\beta$ ), PO<sub>2</sub> at loss of equilibrium (P<sub>LOE</sub>), stroke volume in hypoxia (SV<sub>hypoxia</sub>), upper critical thermal maximum (CT<sub>max</sub>) and cardiac output during warming (CO<sub>warming</sub>).
